# Supplementary material
Source: MDPI journal article supplement (https://www.mdpi.com/2073-4395/13/12/3078)
Supplement: s1 [file s1]

**Supplementary Table S1. Gene quantitative primers**

| Genes               | Sequences (5'-3')                                                                                |
|---------------------|--------------------------------------------------------------------------------------------------|
| Actin               | Actin-F: TGGGTTTGCTGGAGATGAT<br>Actin-R: CAGTTAGGAGAACTGGGTGC                                    |
| <i>FaAHP1-like</i>  | <i>FaAHP1-like</i> -F: GCATTGCATTCCGTAACCTCG<br><i>FaAHP1-like</i> -R: GCCATAATCTGTTGCTCCAGC     |
| <i>FaHK2-like</i>   | <i>FaHK2-like</i> -F: CAGATAGCATCCCTTGAATGTACC<br><i>FaHK2-like</i> -R: GTCCTCAGCTTCTACATATTCTGC |
| <i>FaARR1-like</i>  | <i>FaARR1-like</i> -F: GGATTAGAGATGGACCTGCC<br><i>FaARR1-like</i> -R: CCGAGGATGAGTAATCTGGTTC     |
| <i>FaARF5</i>       | <i>FaARF5</i> -F: CTTTCTCTGCGACATTGAGGC<br><i>FaARF5</i> -R: CACTTATGAACCGTGACTGGC               |
| <i>FaLAX2</i>       | <i>FaLAX2</i> -F: CAGTTGGGACTCTTATCAGGC<br><i>FaLAX2</i> -R: GGACCAAGTAACCCATCAAGC               |
| <i>FaMETTL5</i>     | <i>FaMETTL5</i> -F: GGAGACCTTGCAGATTCCTTG<br><i>FaMETTL5</i> -R: GATGCAATGTGGGCTCCAG             |
| <i>FaAUX28-like</i> | <i>FaAUX28-like</i> -F: GAAGGAGGAGGAGATCAGGTG<br><i>FaAUX28-like</i> -R: GTTCATCATCAAGCTCTTGGAC  |
| <i>FaIAA8-like</i>  | <i>FaIAA8-like</i> -F: CTTTGTCTTGCTGTGGTTTGG<br><i>FaIAA8-like</i> -R: CTTATAGGTGGCCAACCCAC      |
| <i>FaIAA9</i>       | <i>FaIAA9</i> -F: GGATCCCAATCACCAGAACG<br><i>FaIAA9</i> -R: GCAGAAGCAGGAAACATCCAC                |
| <i>FaIAA27</i>      | <i>FaIAA27</i> -F: CTTGGAGCATGATTACATAGGC<br><i>FaIAA27</i> -R: CCAGACACACAGGGTTTAAGTG           |
| <i>FaPP2C10</i>     | <i>FaPP2C10</i> -F: GTCAACAGACCATGAACCCAAC<br><i>FaPP2C10</i> -R: CTGATCGTAAATGCGACTTGAGG        |
| <i>FaPP2C12</i>     | <i>FaPP2C12</i> -F: GCTGCTGAAGCGAGAATTGG<br><i>FaPP2C12</i> -R: CCGTTATGCCCATCAAATAGC            |
| <i>FaPP2C13</i>     | <i>FaPP2C13</i> -F: GGCCTTGGCTGATGAACAC                                                          |

---

|                 |                                             |
|-----------------|---------------------------------------------|
|                 | <i>FaPP2C13</i> -R: GTTCCGGCGAGTAAGTAGG     |
| <i>FaPP2C27</i> | <i>FaPP2C27</i> -F: GATAACATGAAGCAACCCAACAC |
|                 | <i>FaPP2C27</i> -R: CTTCCAGACCGAAATACAGGTAC |
| <i>FaABF1</i>   | <i>FaABF1</i> -F: CTGTGGAAGAGGTATGGTCAGAG   |
|                 | <i>FaABF1</i> -R: CCTTGTGGATGAATTGGGTCAC    |
| <i>FaABF5</i>   | <i>FaABF5</i> -F: GGAGTTCTTGGTGAGAGCTG      |
|                 | <i>FaABF5</i> -R: CTGCTGAAACCCGAATCCTG      |

---
